# Supplementary material
Source: publisher site journal article supplement (https://www.dovepress.com/article/486625)
Supplement: Supplementary file 1 [file get_supplementary_file.php]

**Supplementary Table 1** Baseline, intraoperative and postoperative data

|  | **Group 1**  **(n = 53)** | **Group 2**  **(n = 69)** | **Group 3**  **(n = 70)** | **Group 4**  **(n = 20)** | ***P value*** |
| --- | --- | --- | --- | --- | --- |
| Age, years | 71.00 (68.00,75.00) | 72.00 (69.00,76.00) | 72.50 (70.00,76.00) | 76.00 (71.75,81.00) | 0.024 |
| Gender, female, n (%) | 23 (43.40) | 46 (66.67) | 47 (67.14) | 14 (70.00) | 0.022 |
| BMI, kg/m2 | 24.75 ± 2.88 | 24.98 ± 4.29 | 24.00 ± 4.41 | 23.22 ± 3.67 | 0.232 |
| Education, n (%) |  |  |  |  | 0.112 |
| Primary | 19 (35.85) | 36 (52.17) | 40 (57.14) | 11 (55.00) |  |
| Secondary | 29 (54.72) | 32 (46.38) | 25 (35.71) | 8 (40.00) |  |
| Tertiary | 5 (9.43) | 1 (1.45) | 5 (7.14) | 1 (5.00) |  |
| Smoking, n (%) | 21 (39.62) | 17 (24.64) | 20 (28.57) | 3 (15.00) | 0.140 |
| Drinking, n (%) | 20 (37.74) | 15 (21.74) | 17 (24.29) | 4 (20.00) | 0.183 |
| ASA, n (%) |  |  |  |  | 0.005 |
| II | 43 (81.13) | 48 (69.57) | 53 (75.71) | 8 (40.00) |  |
| III | 10 (18.87) | 21 (30.43) | 17 (24.29) | 12 (60.00) |  |
| Comorbidities, n (%) |  |  |  |  |  |
| Hypertension | 35 (66.04) | 52 (75.36) | 36 (51.43) | 14 (70.00) | 0.028 |
| Coronary disease | 8 (15.09) | 11 (15.94) | 8 (11.43) | 5 (25.00) | 0.512 |
| Diabetes | 10 (18.87) | 17 (24.64) | 15 (21.43) | 4 (20.00) | 0.888 |
| Respiratory disease | 6 (11.32) | 5 (7.25) | 6 (8.57) | 1 (5.00) | 0.855 |
| CNS disease | 8 (15.09) | 11 (15.94) | 8 (11.43) | 5 (25.00) | 0.512 |
| Anemia | 6 (11.32) | 12 (17.39) | 10 (14.29) | 8 (40.00) | 0.028 |
| Liver disease | 0 (0.00) | 3 (4.35) | 4 (5.71) | 0 (0.00) | 0.324 |
| Kidney disease | 0 (0.00) | 0 (0.00) | 0 (0.00) | 1 (5.00) | 0.094 |
| FRAIL score |  |  |  |  | 0.027 |
| Unfrail | 30 (56.60) | 26 (37.68) | 39 (55.71) | 4 (20.00) |  |
| Pre-frail | 13 (24.53) | 18 (26.09) | 17 (24.29) | 8 (40.00) |  |
| Frail | 10 (18.87) | 25 (36.23) | 14 (20.00) | 8 (40.00) |  |
| MMSE score | 28.55 ± 1.26 | 27.39 ± 2.03 | 27.96 ± 1.37 | 27.55 ± 1.88 | 0.002 |
| HADS-anxiety score | 4.00 (3.00,5.00) | 5.00 (3.00,8.00) | 4.00 (3.00,5.00) | 4.50 (3.00,9.00) | 0.159 |
| HADS-depression score | 3.00 (3.00,4.00) | 4.00 (3.00,6.00) | 4.00 (3.00,5.00) | 3.00 (3.00,6.25) | 0.699 |
| Preoperative PSQI score | 2.00 (0.00,3.00) | 2.00 (0.00,4.00) | 2.00 (0.00,4.75) | 2.50 (1.75,3.25) | 0.659 |
| Preoperative pain score | 2.00 (2.00,3.00) | 2.00 (2.00,3.00) | 2.50 (2.00,3.00) | 3.00 (2.00,3.00) | 0.478 |
| Surgery duration, min | 130.00 (110.00,165.00) | 135.00 (103.00,175.00) | 140.00 (110.00,173.75) | 115.00 (90.00,151.25) | 0.371 |
| Anesthesia duration, min | 155.00 (140.00,190.00) | 160.00 (135.00,205.00) | 170.00 (143.00,204.50) | 145.00 (113.75,191.25) | 0.350 |
| Timing of surgery, n (%) |  |  |  |  | 0.308 |
| Daytime | 50 (94.34) | 59 (85.51) | 61 (87.14) | 16 (80.00) |  |
| Nighttime | 3 (5.66) | 10 (14.49) | 9 (12.86) | 4 (20.00) |  |
| Surgery type, n (%) |  |  |  |  | 0.002 |
| Spine | 31 (58.49) | 51 (73.91) | 51 (72.86) | 7 (35.00) |  |
| Hip/knee | 18 (33.96) | 11 (15.94) | 11 (15.71) | 6 (30.00) |  |
| Others | 4 (7.55) | 7 (10.14) | 8 (11.43) | 7 (35.00) |  |
| Anesthesia maintenance scheme, n (%) |  |  |  |  | 0.030 |
| Sevoflurane | 6 (11.32) | 5 (7.25) | 9 (12.86) | 0 (0.00) |  |
| Propofol | 28 (52.83) | 53 (76.81) | 36 (51.43) | 13 (65.00) |  |
| Sevoflurane + Propofol | 19 (35.85) | 11 (15.94) | 25 (35.71) | 7 (35.00) |  |
| PSI | 37.48 (32.08,40.36) | 35.83 (29.45,43.14) | 35.03 (29.82,41.96) | 40.74 (34.55,44.67) | 0.254 |
| BS duration, min | 7.72 (0.00,45.48) | 14.82 (2.20,99.52) | 5.36 (1.07,73.93) | 35.12 (9.06,68.26) | 0.193 |
| BS percent, % | 0.08 (0.00,0.68) | 0.18 (0.02,1.18) | 0.09 (0.01,0.94) | 0.50 (0.13,1.07) | 0.130 |
| Pain score at rest on POD 1 | 1.00 (0.00,2.00) | 2.00 (1.00,2.00) | 2.00 (1.00,3.00) | 0.50 (0.00,1.25) | < 0.001 |
| Pain score on movement on POD 1 | 3.00 (3.00,4.00) | 5.00 (4.00,6.00) | 4.00 (3.00,6.00) | 3.50 (3.00,5.00) | < 0.001 |
| Pain score at rest on POD 3 | 0.00 (0.00,0.00) | 0.00 (0.00,1.00) | 0.00 (0.00,1.00) | 1.00 (0.00,1.00) | 0.002 |
| Pain score on movement on POD 3 | 2.00 (1.00,2.00) | 2.00 (2.00,3.00) | 2.00 (2.00,3.00) | 2.00 (2.00,3.00) | < 0.001 |
| Postoperative delirium, n (%) | 4 (7.55) | 10 (14.49) | 3 (4.29) | 3 (15.00) | 0.159 |

**Notes:** Values are expressed as mean ± standard deviation, median (interquartile range), or number (percentage). Group 1: Non-PSD on both POD1 and POD3; Group 2: PSD on both POD1 and POD3; Group 3: PSD only on POD1; Group 4: PSD only on POD3.

**Abbreviations:** ASA: American Society of Anesthesiologists, BMI: body mass index, BS: burst suppression, CNS: central nervous system, FRAIL: Fatigue, Resistance, Ambulation, Illness, Loss of weight, HADS: Hospital Anxiety and Depression Scale, MMSE: Mini-Mental State Examination, POD: postoperative day, PSD: postoperative sleep disturbance, PSI: patient state index, PSQI: Pittsburgh Sleep Quality Index.

**Supplementary Table 2** Comparison of intraoperative frontal power spectrum and discrete sleep spindle activity

|  | **Group 1**  **(n = 53)** | **Group 2**  **(n = 69)** | **Group 3**  **(n = 70)** | **Group 4**  **(n = 20)** | ***P value*** | **Group 1 v.s.**  **Group 2** | **Group 1**  **v.s.**  **Group 3** | **Group 1 v.s.**  **Group 4** | **Group 2**  **v.s. Group 3** | **Group 2**  **v.s.**  **Group 4** | **Group 3 v.s.**  **Group 4** |
| --- | --- | --- | --- | --- | --- | --- | --- | --- | --- | --- | --- |
| **Absolute power, dB** |  |  |  |  |  |  |  |  |  |  |  |
| Total power | 7.01 (4.60,10.21) | 7.54 (4.34,10.26) | 6.88 (4.59,11.25) | 5.09 (3.50,7.21) | 0.320 | 1.000 | 1.000 | 0.984 | 1.000 | 0.457 | 0.487 |
| Delta (1-4 Hz) | 4.29 (2.50,5.63) | 4.51 (2.89,6.24) | 4.00 (2.71,6.81) | 3.71 (2.76,5.32) | 0.829 | 1.000 | 1.000 | 1.000 | 1.000 | 1.000 | 1.000 |
| Theta (4-8 Hz) | 1.12 (0.67,1.75) | 1.20 (0.68,1.99) | 1.27 (0.73,1.84) | 0.80 (0.61,1.11) | 0.113 | 1.000 | 1.000 | 0.380 | 1.000 | 0.170 | 0.104 |
| Alpha (8-12 Hz) | 1.21 (0.49,1.65) | 0.89 (0.41,1.57) | 1.02 (0.67,1.98) | 0.42 (0.26,0.65) | **< 0.001** | 1.000 | 1.000 | **0.001** | 0.737 | **0.005** | **< 0.001** |
| Sigma (11-16 Hz) | 0.56 (0.24,1.01) | 0.39 (0.21,1.11) | 0.58 (0.36,0.98) | 0.19 (0.12,0.29) | **< 0.001** | 1.000 | 1.000 | **< 0.001** | 0.306 | **0.002** | **< 0.001** |
| Beta (12-30 Hz) | 0.13 (0.08,0.30) | 0.12 (0.06,0.28) | 0.16 (0.09,0.24) | 0.05 (0.04,0.09) | **< 0.001** | 1.000 | 1.000 | **0.005** | 0.859 | **0.012** | **< 0.001** |
| **Relative power, %** |  |  |  |  |  |  |  |  |  |  |  |
| Rdelta | 63.67 (53.76,69.36) | 66.25 (55.93,74.69) | 59.24 (53.64,69.00) | 75.10 (71.52,79.52) | **< 0.001** | 1.000 | 1.000 | **< 0.001** | 0.280 | **0.002** | **< 0.001** |
| Rtheta | 17.77 (14.83,20.07) | 16.44 (13.48,21.52) | 18.02 (15.11,20.63) | 15.53 (13.85,16.72) | **0.034** | 1.000 | 1.000 | 0.066 | 1.000 | 0.135 | **0.024** |
| Ralpha | 15.43 (11.68,23.88) | 13.54 (9.27,23.59) | 17.18 (13.15,24.25) | 7.79 (5.21,11.18) | **< 0.001** | 1.000 | 1.000 | **< 0.001** | 0.257 | **0.003** | **< 0.001** |
| Rsigma | 7.44 (5.74,12.93) | 6.17 (3.88,10.53) | 8.43 (5.90,12.92) | 3.44 (2.07,5.68) | **< 0.001** | 0.358 | 1.000 | **< 0.001** | 0.088 | **0.007** | **< 0.001** |
| Rbeta | 2.17 (1.57,3.44) | 1.79 (1.14,2.72) | 2.32 (1.49,3.36) | 1.19 (0.82,2.07) | **< 0.001** | 0.609 | 1.000 | **0.004** | 0.166 | 0.123 | **0.001** |
| **Sleep spindle activity** |  |  |  |  |  |  |  |  |  |  |  |
| Fp1 density | 0.03 (0.00,0.34) | 0.01 (0.00,0.28) | 0.04 (0.01,0.22) | 0.00 (0.00,0.01) | **0.002** | 1.000 | 1.000 | **0.004** | 1.000 | **0.028** | **0.001** |
| Fp2 density | 0.05 (0.00,0.29) | 0.02 (0.00,0.21) | 0.07 (0.00,0.52) | 0.00 (0.00,0.00) | **< 0.001** | 1.000 | 1.000 | **0.003** | 0.459 | **0.034** | **< 0.001** |
| F7 density | 0.81 (0.24,1.65) | 0.22 (0.02,1.49) | 0.80 (0.26,1.95) | 0.02 (0.01,0.15) | **< 0.001** | 0.292 | 1.000 | **< 0.001** | **0.031** | **0.027** | **< 0.001** |
| F8 density | 0.95 (0.28,1.80) | 0.38 (0.04,1.55) | 1.08 (0.33,2.01) | 0.04 (0.01,0.34) | **< 0.001** | 0.466 | 1.000 | **0.001** | **0.040** | **0.032** | **< 0.001** |
| Fp1/Fp2 mean density | 0.63 (0.50,0.74) | 0.61 (0.00,0.67) | 0.62 (0.56,0.71) | 0.00 (0.00,0.62) | **0.022** | 0.686 | 1.000 | 0.095 | 0.328 | 1.000 | **0.049** |
| F7/F8 mean density | 0.87 (0.30,1.77) | 0.30 (0.03,1.45) | 0.94 (0.29,2.01) | 0.04 (0.01,0.26) | **< 0.001** | 0.350 | 1.000 | **< 0.001** | **0.033** | **0.033** | **< 0.001** |
| Total density | 1.88 (0.70,4.72) | 0.59 (0.07,3.40) | 1.94 (0.64,4.74) | 0.08 (0.02,0.56) | **< 0.001** | 0.269 | 1.000 | **< 0.001** | **0.044** | **0.028** | **< 0.001** |
| Spindle duration | 0.73 (0.68,0.80) | 0.70 (0.63,0.76) | 0.72 (0.66,0.75) | 0.66 (0.63,0.75) | 0.068 | 0.167 | 0.712 | 0.156 | 1.000 | 1.000 | 1.000 |

**Notes:** Values are expressed as median (interquartile range).

**Abbreviations:** POD: postoperative day, PSD: postoperative sleep disturbance.

**Supplementary Table 3** Multivariable Logistic Regression Analysis of Group 2 vs. Group 1

|  | **OR** | **95% CI** | ***P* value** |
| --- | --- | --- | --- |
| Gender |  |  |  |
| Male | 1.00 | Reference |  |
| Female | 3.91 | 1.43-10.47 | 0.008 |
| Surgery type |  |  |  |
| Hip/knee | 1.00 | Reference |  |
| Spine | 4.80 | 1.46-15.84 | 0.010 |
| Others | 1.40 | 0.20-9.58 | 0.732 |
| Pain score on movement on POD1 | 1.40 | 1.01-1.94 | 0.044 |
| Pain score on movement on POD3 | 1.84 | 1.08-3.14 | 0.024 |
| Relative sigma power, % | 0.91 | 0.84-0.99 | 0.025 |

﻿Group 1: patients without PSD on either POD1 or POD3, Group 2: patients with PSD on both POD1 and POD3.

**Abbreviations:** CI: confidence interval, OR: odds ratio, POD: postoperative day, PSD: postoperative sleep disturbance.

**Supplementary Table 4** Multivariable Logistic Regression Analysis of Group 3 vs. Group 1

|  | **OR** | **95% CI** | ***P* value** |
| --- | --- | --- | --- |
| Gender |  |  |  |
| Male | 1.00 | Reference |  |
| Female | 2.98 | 1.13-7.91 | 0.022 |
| Surgery type |  |  |  |
| Hip/knee | 1.00 | Reference |  |
| Spine | 3.12 | 1.04-9.33 | 0.042 |
| Others | 5.60 | 0.89-35.18 |  |

Group 1: patients without PSD on either POD1 or POD3, Group 3: patients with PSD only on POD1.

**Abbreviations:** ASA: American Society of Anesthesiologists, CI: confidence interval, OR: odds ratio, POD: postoperative day, PSD: postoperative sleep disturbance.

**Supplementary Table 5** Multivariable Logistic Regression Analysis of Group 4 vs. Group 1

|  | **OR** | **95% CI** | ***P* value** |
| --- | --- | --- | --- |
| ASA |  |  |  |
| II | 1.00 | Reference |  |
| III | 11.17 | 2.14-58.23 | 0.004 |
| Pain score on movement on POD3 | 3.86 | 1.39-10.72 | 0.010 |
| F7/F8 mean density | 0.08 | 0.01-0.43 | 0.004 |

Group 1: patients without PSD on either POD1 or POD3, Group 4: patients with PSD only on POD3.

**Abbreviations:** CI: confidence interval, OR: odds ratio, POD: postoperative day, PSD: postoperative sleep disturbance.
